# Supplementary material for: General practitioners’ perspectives on a proposed new model of service delivery for primary care management of knee osteoarthritis: a qualitative study
Source: Springer Nature journal article supplement (doi:10.1186/s12875-017-0656-7), 2017-09-07
Supplement: MOESM1 [file 15029298]

## Additional File 1

### Consolidated criteria for reporting qualitative studies (COREQ): 32-item checklist

Adapted from:

Tong A, Sainsbury P, Craig J. Consolidated criteria for reporting qualitative research (COREQ): a 32-item checklist for interviews and focus groups. *International Journal for Quality in Health Care*. 2007. Volume 19, Number 6: pp. 349 – 357

| No. Item                                       | Guide questions/description                                                                                                                              | Comment                                                                                                              |
|------------------------------------------------|----------------------------------------------------------------------------------------------------------------------------------------------------------|----------------------------------------------------------------------------------------------------------------------|
| <b>Domain 1: Research team and reflexivity</b> |                                                                                                                                                          |                                                                                                                      |
| <i>Personal Characteristics</i>                |                                                                                                                                                          |                                                                                                                      |
| 1. Inter viewer/facilitator                    | Which author/s conducted the interview or focus group?                                                                                                   | Reported in manuscript                                                                                               |
| 2. Credentials                                 | What were the researcher's credentials? E.g. PhD, MD                                                                                                     | Reported in manuscript                                                                                               |
| 3. Occupation                                  | What was their occupation at the time of the study?                                                                                                      | Reported in manuscript                                                                                               |
| 4. Gender                                      | Was the researcher male or female?                                                                                                                       | Reported in manuscript                                                                                               |
| 5. Experience and training                     | What experience or training did the researcher have?                                                                                                     | Completed a short course on qualitative research and experience in several previous qualitative studies              |
| <i>Relationship with participants</i>          |                                                                                                                                                          |                                                                                                                      |
| 6. Relationship established                    | Was a relationship established prior to study commencement?                                                                                              | Reported in manuscript                                                                                               |
| 7. Participant knowledge of the interviewer    | What did the participants know about the researcher? e.g. personal goals, reasons for doing the research                                                 | Participants knew that interviewer was undertaking the interviews for the study and who the lead investigators were. |
| 8. Interviewer characteristics                 | What characteristics were reported about the inter viewer/facilitator? e.g. Bias, assumptions, reasons and interests in the research topic               | Reported in manuscript (Interviewer was not involved in development of the model)                                    |
| <b>Domain 2: study design</b>                  |                                                                                                                                                          |                                                                                                                      |
| <i>Theoretical framework</i>                   |                                                                                                                                                          |                                                                                                                      |
| 9. Methodological orientation and Theory       | What methodological orientation was stated to underpin the study? e.g. grounded theory, discourse analysis, ethnography, phenomenology, content analysis | Data analysis was underpinned by a constructionist theoretical                                                       |

|                                        |                                                                                    |                                                                                                                                     |
|----------------------------------------|------------------------------------------------------------------------------------|-------------------------------------------------------------------------------------------------------------------------------------|
|                                        |                                                                                    | perspective                                                                                                                         |
| <i>Participant selection</i>           |                                                                                    |                                                                                                                                     |
| 10. Sampling                           | How were participants selected? e.g. purposive, convenience, consecutive, snowball | Reported in manuscript                                                                                                              |
| 11. Method of approach                 | How were participants approached? e.g. face-to-face, telephone, mail, email        | Reported in manuscript                                                                                                              |
| 12. Sample size                        | How many participants were in the study?                                           | Reported in manuscript                                                                                                              |
| 13. Non-participation                  | How many people refused to participate or dropped out? Reasons?                    | N/a. Since participants approached us in response to advertising of study through networks, non-participation cannot be determined. |
| <i>Setting</i>                         |                                                                                    |                                                                                                                                     |
| 14. Setting of data collection         | Where was the data collected? e.g. home, clinic, workplace                         | Reported in manuscript                                                                                                              |
| 15. Presence of non-participants       | Was anyone else present besides the participants and researchers?                  | N/a                                                                                                                                 |
| 16. Description of sample              | What are the important characteristics of the sample? e.g. demographic data, date  | Reported in manuscript                                                                                                              |
| <i>Data collection</i>                 |                                                                                    |                                                                                                                                     |
| 17. Interview guide                    | Were questions, prompts, guides provided by the authors? Was it pilot tested?      | Interview guide reported in manuscript. Not pilot tested.                                                                           |
| 18. Repeat interviews                  | Were repeat inter views carried out? If yes, how many?                             | No repeat interviews because too much burden for participants                                                                       |
| 19. Audio/visual recording             | Did the research use audio or visual recording to collect the data?                | Reported in manuscript                                                                                                              |
| 20. Field notes                        | Were field notes made during and/or after the interview or focus group?            | Reported in manuscript                                                                                                              |
| 21. Duration                           | What was the duration of the inter views or focus group?                           | Reported in manuscript                                                                                                              |
| 22. Data saturation                    | Was data saturation discussed?                                                     | Reported in manuscript                                                                                                              |
| 23. Transcripts returned               | Were transcripts returned to participants for comment and/or correction?           | No return of transcripts because too much burden for participants                                                                   |
| <b>Domain 3: analysis and findings</b> |                                                                                    |                                                                                                                                     |
| <i>Data analysis</i>                   |                                                                                    |                                                                                                                                     |
| 24. Number of data coders              | How many data coders coded the data?                                               | Reported in                                                                                                                         |

|                                    |                                                                                                                                 |                                                                               |
|------------------------------------|---------------------------------------------------------------------------------------------------------------------------------|-------------------------------------------------------------------------------|
|                                    |                                                                                                                                 | manuscript                                                                    |
| 25. Description of the coding tree | Did authors provide a description of the coding tree?                                                                           | Reported in manuscript                                                        |
| 26. Derivation of themes           | Were themes identified in advance or derived from the data?                                                                     | Reported in manuscript                                                        |
| 27. Software                       | What software, if applicable, was used to manage the data?                                                                      | Reported in manuscript                                                        |
| 28. Participant checking           | Did participants provide feedback on the findings?                                                                              | No checking of findings by any participants because of burden to participants |
| <i>Reporting</i>                   |                                                                                                                                 |                                                                               |
| 29. Quotations presented           | Were participant quotations presented to illustrate the themes/findings? Was each quotation identified? e.g. participant number | Reported in manuscript and Additional file 1                                  |
| 30. Data and findings consistent   | Was there consistency between the data presented and the findings?                                                              | Original data provided. Consistency established by our independent GP         |
| 31. Clarity of major themes        | Were major themes clearly presented in the findings?                                                                            | Reported in text and table                                                    |
| 32. Clarity of minor themes        | Is there a description of diverse cases or discussion of minor themes?                                                          | Reported in text and table                                                    |
